# Supplementary material
Source: PubMed Central journal article supplement (PMC8216611)
Supplement: CJN.15751020SupplementaryData.pdf [file CJN.15751020SupplementaryData.pdf]

## **Supplemental Materials**

**Supplemental Appendix 1.** Supplemental methods

**Supplemental Table 1.** The prevalence of CAC based on smoking status between men and women

**Supplemental Table 2.** Categorization of former smokers based on smoking load and cessation duration

**Supplemental Table 3.** Prevalence rate for CAC in four combination groups based on smoking dose and cessation duration in 495 former smokers

**Supplemental Table 4.** The prevalence of CAC for former smokers among CKD stage 3–5 participants

**Supplemental Table 5.** The prevalence of CAC for former smokers compared with current smokers using different CAC cutoff values

**Supplemental Table 6.** Comparison of baseline characteristics in patients with and without follow-up CAC measurements

**Supplemental Table 7.** Associations of smoking with CAC progression using different definitions in patients with baseline CAC

**Supplemental Figure 1.** Study participants

**Supplemental Figure 2.** Correlation of baseline CAC score and CAC score changes

**Supplemental Figure 3.** Comparison of CAC score changes between patients with and without baseline CAC

## **Supplemental Appendix 1. Supplemental methods**

At study enrollment, baseline demographics and clinical data including comorbidities, cause of CKD, economic status, educational level, and medications were collected by a well-trained research coordinator. An 8-hour fasting blood and the second voided or random urine were used to measure serum creatinine, intact parathyroid hormone, and urinary protein-to-creatinine ratios at the central laboratory (Lab Genomics, Seoul, Korea). Other laboratory variables were measured at the hospital laboratory of each participating center. Estimated glomerular filtration rate was calculated using the CKD Epidemiology Collaboration equation<sup>1</sup> and CKD stage 1–5 (non-dialysis) was classified according to the Kidney Disease Improving Global Outcomes guideline.<sup>2</sup>

### Reference

1. Levey AS, Stevens LA, Schmid CH, Zhang YL, Castro AF, 3rd, Feldman HI, et al.: A new equation to estimate glomerular filtration rate. *Ann Intern Med* 150:604-612, 2009.
2. Chapter 1: Definition and classification of CKD. *Kidney Int Suppl* (2011) 3:19-62, 2013.

**Supplemental Table 1.** The prevalence of CAC based on smoking status between men and women

|                | Men ( <i>n</i> =1141) |                                        |         | Women ( <i>n</i> =773) |                                        |         |
|----------------|-----------------------|----------------------------------------|---------|------------------------|----------------------------------------|---------|
|                | No. of Events (%)     | <sup>1</sup> Prevalence ratio (95% CI) | P-value | No. of Events (%)      | <sup>1</sup> Prevalence ratio (95% CI) | P-value |
| Never smoker   | 142/280 (51)          | 1.00                                   |         | 269/710 (38)           | 1.00                                   |         |
| Former smoker  | 337/554 (60)          | 1.10 (0.99 to 1.23)                    | 0.09    | 9/38 (24)              | 0.88 (0.54 to 1.43)                    | 0.6     |
| Current smoker | 181/307 (59)          | 1.21 (1.07 to 1.38)                    | 0.002   | 14/25 (56)             | 1.54 (1.10 to 2.17)                    | 0.01    |

<sup>1</sup>Model was adjusted for age, diabetes mellitus, economic status, educational level, body mass index, systolic blood pressure, statin use, calcium-phosphate products, eGFR, and UPCR.

Abbreviations: CAC, coronary artery calcification; CI, confidence interval; eGFR, estimated glomerular filtration rate; UPCR, urinary protein-to-creatinine ratio.

**Supplemental Table 2.** Categorization of former smokers based on smoking load and cessation duration

|                                                      | Former smokers<br>(N=592) |
|------------------------------------------------------|---------------------------|
| Smoking load, median [IQR], pack-years               | 15 [7 to 30]              |
| 0.1 to <10 pack-years ( <i>n</i> =190)               | 3 [1 to 6]                |
| 10 to <20 pack-years ( <i>n</i> =136)                | 13 [10 to 15]             |
| ≥20 pack-years ( <i>n</i> =266)                      | 30 [25 to 40]             |
| <sup>1</sup> Cessation duration, median [IQR], years | 12 [7 to 20]              |
| 0.5 to <10 years ( <i>n</i> =190)                    | 5 [2 to 8]                |
| 10 to <20 years ( <i>n</i> =183)                     | 14 [12 to 17]             |
| ≥20 years ( <i>n</i> =122)                           | 27 [23 to 33]             |

<sup>1</sup>Cessation duration was available in 495 former smokers.

**Supplemental Table 3.** Prevalence rate for CAC in four combination groups based on smoking dose and cessation duration in 495 former smokers

|                                                 | Light smoking<br>(0.1 to <10 pack-years) | Heavy smoking<br>(≥10 pack-years) |
|-------------------------------------------------|------------------------------------------|-----------------------------------|
| Short quitting (0.5 to <10 years), <i>n</i> (%) | 8/40 (20)                                | 97/150 (65)                       |
| Long quitting (≥10 years), <i>n</i> (%)         | 61/130 (47)                              | 118/175 (67)                      |

Abbreviations: CAC, coronary artery calcification.

**Supplemental Table 4.** The prevalence of CAC for former smokers among CKD stage 3–5 participants

|                                               | Former vs. never smoker                |         | Former vs. current smoker              |         |
|-----------------------------------------------|----------------------------------------|---------|----------------------------------------|---------|
|                                               | <sup>1</sup> Prevalence ratio (95% CI) | P-value | <sup>1</sup> Prevalence ratio (95% CI) | P-value |
| Never smoker ( <i>n</i> =645)                 | 1.00                                   |         | –                                      |         |
| <sup>2,3</sup> Former smoker ( <i>n</i> =362) |                                        |         |                                        |         |
| Light smoking-short quitters ( <i>n</i> =21)  | 1.05 (0.59 to 1.87)                    | 0.88    | 0.71 (0.39 to 1.27)                    | 0.24    |
| Heavy smoking-short quitters ( <i>n</i> =108) | 1.04 (0.88 to 1.24)                    | 0.63    | 0.86 (0.73 to 1.02)                    | 0.09    |
| Light smoking-long quitters ( <i>n</i> =99)   | 0.98 (0.81 to 1.20)                    | 0.9     | 0.76 (0.63 to 0.93)                    | 0.01    |
| Heavy smoking-long quitters ( <i>n</i> =134)  | 1.00 (0.88 to 1.17)                    | 0.9     | 0.84 (0.73 to 0.97)                    | 0.02    |
| Current smoker ( <i>n</i> =222)               | –                                      |         | 1.00                                   |         |

<sup>1</sup>Model was adjusted for age, diabetes mellitus, economic status, educational level, body mass index, systolic blood pressure, statin use, calcium-phosphate products, eGFR, and UPCR.

<sup>2</sup>According to 10 pack-years of smoking dose, former smokers were categorized into light (<10 pack-years) and heavy ( $\geq$ 10 pack-years) smokers.

<sup>3</sup>According to 10 years of cessation duration, former smokers were categorized into short (<10 years) and long ( $\geq$ 10 years) quitters.

Abbreviations: CAC, coronary artery calcification; CI, confidence interval; CKD, chronic kidney disease; eGFR, estimated glomerular filtration rate; UPCR, urinary protein-to-creatinine ratio.

**Supplemental Table 5.** The prevalence of CAC for former smokers compared with current smokers using different CAC cutoff values

|                              | CAC score >10 AU                       |         | CAC score >100 AU                      |         |
|------------------------------|----------------------------------------|---------|----------------------------------------|---------|
|                              | <sup>1</sup> Prevalence ratio (95% CI) | P-value | <sup>1</sup> Prevalence ratio (95% CI) | P-value |
| Current smoker               | 1.00                                   |         | 1.00                                   |         |
| <sup>2,3</sup> Former smoker |                                        |         |                                        |         |
| Light smoking-short quitters | 0.59 (0.29 to 1.20)                    | 0.14    | 1.42 (0.56 to 3.56)                    | 0.45    |
| Heavy smoking-short quitters | 0.87 (0.72 to 1.04)                    | 0.13    | 1.06 (0.81 to 1.39)                    | 0.66    |
| Light smoking-long quitters  | 0.64 (0.50 to 0.82)                    | <0.001  | 0.88 (0.63 to 1.21)                    | 0.43    |
| Heavy smoking-long quitters  | 0.74 (0.62 to 0.88)                    | 0.001   | 0.69 (0.52 to 0.91)                    | 0.01    |

<sup>1</sup>Model was adjusted for age, diabetes mellitus, economic status, educational level, body mass index, systolic blood pressure, statin use, calcium-phosphate products, eGFR, and UPCR.

<sup>2</sup>According to 10 pack-years of smoking dose, former smokers were categorized into light (<10 pack-years) and heavy (≥10 pack-years) smokers.



<sup>3</sup>According to 10 years of cessation duration, former smokers were categorized into short (<10 years) and long ( $\geq$ 10 years) quitters.

Abbreviations: AU, Agatston unit; CAC, coronary artery calcification; CI, confidence interval; eGFR, estimated glomerular filtration rate; UPCR, urinary protein-to-creatinine ratio.

**Supplemental Table 6.** Comparison of baseline characteristics in patients with and without follow-up CAC measurements

| Variables                       | Patients with repeated CAC score | Patients without repeated CAC score | P-value |
|---------------------------------|----------------------------------|-------------------------------------|---------|
|                                 | (n=755)                          | (n=811)                             |         |
| Smoking status, <i>n</i> (%)    |                                  |                                     | 0.01    |
| Never smokers                   | 393 (52)                         | 432 (53)                            |         |
| Former smokers                  | 251 (33)                         | 220 (27)                            |         |
| Current smokers                 | 111 (15)                         | 159 (20)                            |         |
| Baseline CAC, <i>n</i> (%)      | 334 (44)                         | 392 (48)                            | 0.11    |
| Age, median [IQR], yr           | 53 [43 to 61]                    | 54 [45 to 63]                       | 0.10    |
| Men, <i>n</i> (%)               | 445 (59)                         | 482 (59)                            | 0.88    |
| Diabetes mellitus, <i>n</i> (%) | 151 (20)                         | 258 (32)                            | <0.001  |
| Economic status, <i>n</i> (%)   |                                  |                                     | 0.29    |
| High (>4,500 \$/m)              | 193 (26)                         | 181 (22)                            |         |
| Middle (1,500–4,500 \$/m)       | 425 (56)                         | 469 (58)                            |         |
| Low (<1,500 \$/m)               | 137 (18)                         | 161 (20)                            |         |
| Educational level, <i>n</i> (%) |                                  |                                     | 0.9     |

|                                                |                     |                     |        |
|------------------------------------------------|---------------------|---------------------|--------|
| ≤6 years                                       | 83 (11)             | 89 (11)             |        |
| 7-12 years                                     | 345 (46)            | 374 (46)            |        |
| ≥13 years                                      | 327 (43)            | 348 (43)            |        |
| BMI, mean (SD), kg/m <sup>2</sup>              | 24.3 (3.3)          | 24.8 (3.5)          | 0.002  |
| Systolic BP, mean (SD), mmHg                   | 126 (15)            | 126 (16)            | 0.32   |
| Medications, <i>n</i> (%)                      |                     |                     |        |
| RAAS blocker                                   | 639 (85)            | 697 (86)            | 0.48   |
| Lipid-lowering agents                          | 340 (45)            | 375 (46)            | 0.9    |
| Ca-based P binders                             | 49 (6)              | 64 (8)              | 0.33   |
| eGFR, median [IQR], mL/min/1.73 m <sup>2</sup> | 60 [40 to 86]       | 50 [33 to 79]       | <0.001 |
| UPCR, median [IQR], g/g                        | 0.34 [0.11 to 0.88] | 0.50 [0.15 to 1.35] | 0.003  |
| Hemoglobin, mean (SD), g/dL                    | 13 (3)              | 13 (2)              | 0.1    |
| Albumin, mean (SD), g/dL                       | 4.3 (0.3)           | 4.2 (0.4)           | 0.32   |
| Triglyceride, median [IQR], mg/dL              | 124 [87 to 181]     | 134 [94 to 201]     | 0.05   |
| Total cholesterol, mean (SD), mg/dL            | 176 (34)            | 176 (39)            | 0.9    |
| LDL cholesterol, mean (SD), mg/dL              | 99 (29)             | 99 (32)             | 0.9    |

|                                                              |               |               |      |
|--------------------------------------------------------------|---------------|---------------|------|
| HDL cholesterol, mean (SD), mg/dL                            | 51 (15)       | 50 (16)       | 0.06 |
| Ca x P products, mean (SD), mg <sup>2</sup> /dL <sup>2</sup> | 32 (5)        | 33 (6)        | 0.25 |
| Intact PTH, median [IQR], pg/mL                              | 43 [29 to 64] | 43 [28 to 76] | 0.1  |

---

Abbreviations: BP, blood pressure; BMI, body mass index; Ca, calcium; CAC, coronary artery calcification; CKD, chronic kidney disease; eGFR, estimated glomerular filtration rate; HDL, high-density lipoprotein; IQR, interquartile range; LDL, low-density lipoprotein; P, phosphate; PTH, parathyroid hormone; RAAS, renin-angiotensin-aldosterone system; SD, standard deviation; UPCR, urinary protein-to-creatinine ratio

**Supplemental Table 7.** Associations of smoking with CAC progression using different definitions in patients with baseline CAC

| Definitions                           | Never smokers     |                          |         | Former smokers    |                          |         | Current smokers   |                          |         |
|---------------------------------------|-------------------|--------------------------|---------|-------------------|--------------------------|---------|-------------------|--------------------------|---------|
|                                       | No. of Events (%) | <sup>1</sup> RR (95% CI) | P-value | No. of Events (%) | <sup>1</sup> RR (95% CI) | P-value | No. of Events (%) | <sup>1</sup> RR (95% CI) | P-value |
| $\Delta$ CAC score $\geq$ 100 AU/year | 9/142<br>(6)      | 1.00                     |         | 19/135<br>(14)    | 0.95<br>(0.35 to 2.58)   | 0.9     | 6/60<br>(10)      | 0.83<br>(0.25 to 2.74)   | 0.76    |
| $\Delta$ CAC score $\geq$ 15%/year    | 82/142<br>(58)    | 1.00                     |         | 60/135<br>(59)    | 1.04<br>(0.80 to 1.35)   | 0.79    | 48/60<br>(80)     | 1.43<br>(1.12 to 1.82)   | 0.004   |

<sup>1</sup>Model was adjusted for age, diabetes mellitus, economic status, educational level, body mass index, systolic blood pressure, statin use, calcium-phosphate products, eGFR, and UPCR.

Abbreviations: AU, Agatston unit; CAC, coronary artery calcification; CI, confidence interval; eGFR, estimated glomerular filtration rate; RR, relative risk; UPCR, urinary protein-to-creatinine ratio.

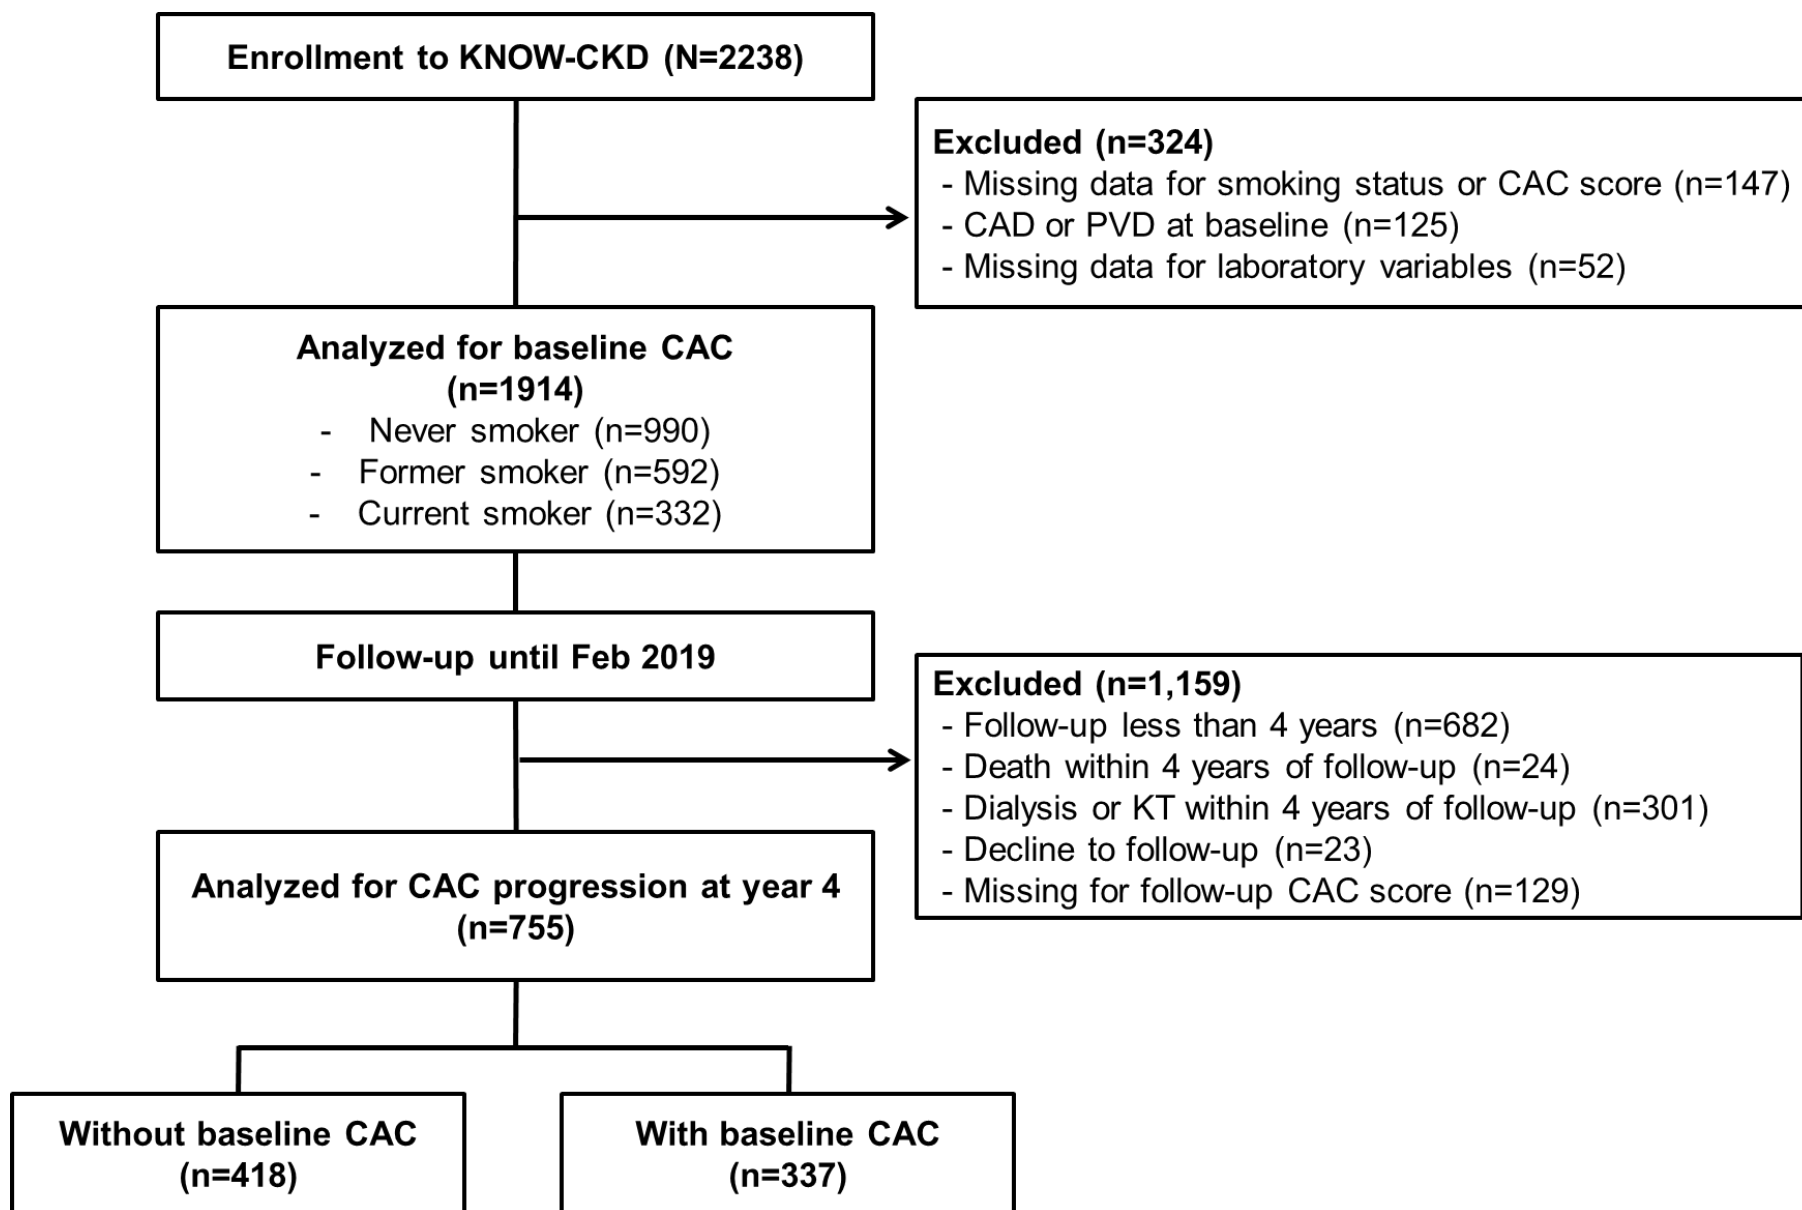

**Supplemental Figure 1. Study participants.** Among initially enrolled 2241 participants from the KNOW-CKD, 1914 participants were analyzed for the presence of CAC. For analysis of CAC progression, 755 participants who underwent repeated CAC measurements were analyzed. Abbreviations: CAC, coronary artery calcification; CAD, coronary artery disease; KNOW-CKD, KoreaN Cohort Study for Outcome in Patients With Chronic Kidney Disease; KT, kidney transplantation; PVD, peripheral vascular disease

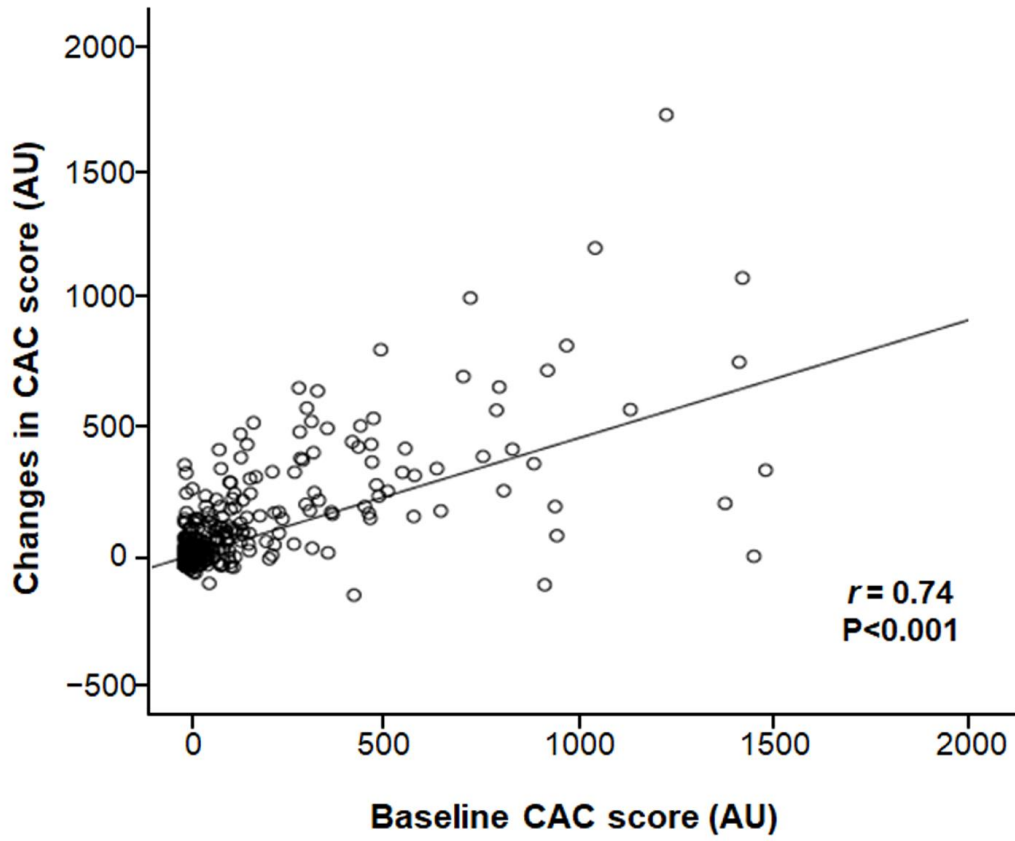

**Supplemental Figure 2. Correlation of baseline CAC score and CAC score changes.**

Abbreviations: AU, Agatston unit; CAC, coronary artery calcification



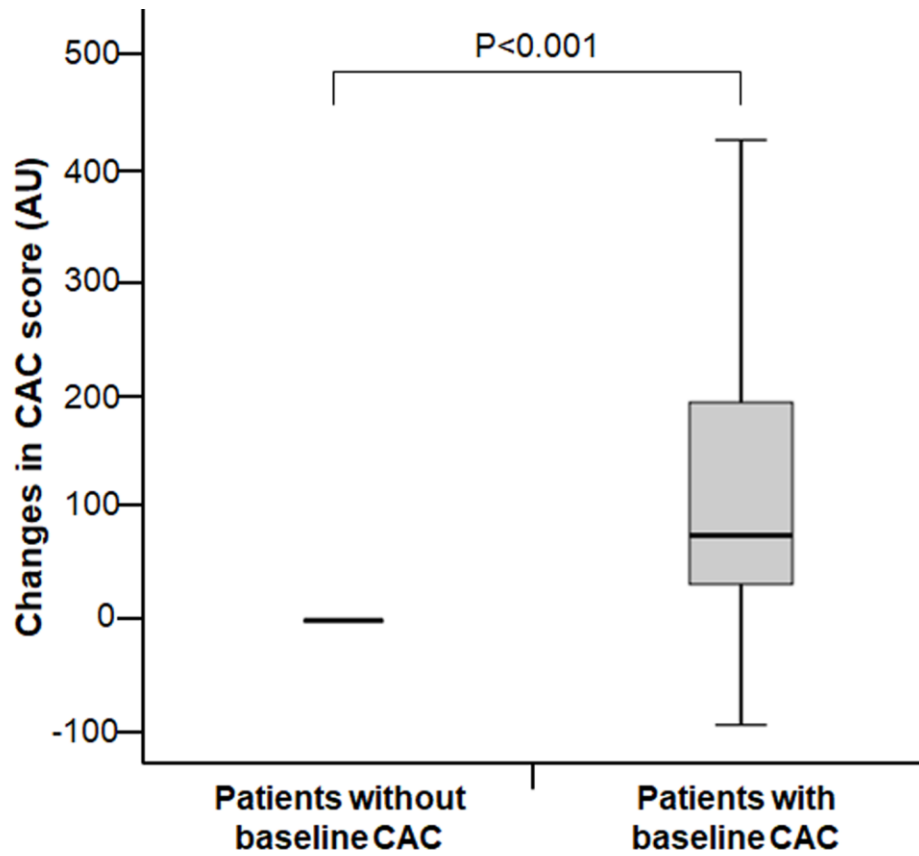

**Supplemental Figure 3. Comparison of CAC score changes between patients with and without baseline CAC. Abbreviations: CAC, coronary artery calcification**
